# Supplementary material
Source: HighWire-hosted journal article supplement (https://bmjopenrespres.bmj.com/content/6/1/e000345)
Supplement: inline-supplementary-material-1 [file inline-supplementary-material-1.pdf]

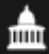

**Thank you for agreeing to take part in this survey. The aim is to explore the use of tele-health services in COPD patients across the UK, and examine which techniques healthcare providers use to set alarm limits. We define tele-health as home monitoring of symptoms, vital signs or other parameters with transmission of data back to the health-care facility. This survey will only take 5 minutes to complete.**

**All completed questionnaires will be entered into a draw to win a £50 Marks and Spencers voucher!**

1. Which Trust do you work for?

2. Your role:

3. Is tele-health used by your Trust to monitor patients with COPD at home?

Yes

No

4. If yes, is tele-health (home monitoring) used for... (check all that apply).

Baseline monitoring (to observe, advise or coach the patient in daily COPD care).

To provide early detection of exacerbations

To help monitor recovery from exacerbations

Other (please specify)

5. The next question is about hardware in the home. What type of tele-health equipment do you use?  
(check all that apply)

Smartphone/tablet App

Monitoring station

Fixed telephone

Video phone

Other (please specify)

6. On a scale 1 (not at all) to 10 (very much so), do you think tele-health is useful in COPD?

1 (not at all)

10 (very much so)

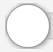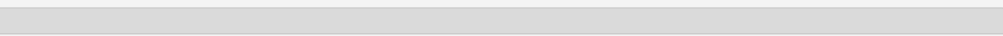

7. If you think tele-health is useful, what is it most useful for?

8. Which variable do you monitor, and if you set an automatic alarm for this variable how do you choose the alarm limits? (select all that apply).

|                                                  | Do you monitor this?     | How do you set the alarm limits? |
|--------------------------------------------------|--------------------------|----------------------------------|
| Heart rate                                       | <input type="checkbox"/> | <input type="text"/>             |
| Oxygen saturation                                | <input type="checkbox"/> | <input type="text"/>             |
| Respiratory rate                                 | <input type="checkbox"/> | <input type="text"/>             |
| Blood pressure                                   | <input type="checkbox"/> | <input type="text"/>             |
| Temperature                                      | <input type="checkbox"/> | <input type="text"/>             |
| Peak flow                                        | <input type="checkbox"/> | <input type="text"/>             |
| Hours of CPAP use                                | <input type="checkbox"/> | <input type="text"/>             |
| Hours of NIV use                                 | <input type="checkbox"/> | <input type="text"/>             |
| Step Count                                       | <input type="checkbox"/> | <input type="text"/>             |
| Physical Activity                                | <input type="checkbox"/> | <input type="text"/>             |
| Metabolic Equivalent data, e.g. from a treadmill | <input type="checkbox"/> | <input type="text"/>             |
| Sleep quality                                    | <input type="checkbox"/> | <input type="text"/>             |
| Phlegm symptoms                                  | <input type="checkbox"/> | <input type="text"/>             |
| Cough symptoms                                   | <input type="checkbox"/> | <input type="text"/>             |
| Breathlessness symptoms                          | <input type="checkbox"/> | <input type="text"/>             |
| Wheeze symptoms                                  | <input type="checkbox"/> | <input type="text"/>             |
| Use of rescue medication                         | <input type="checkbox"/> | <input type="text"/>             |

Other (Please specify)

9. If any alarm limits were personalised to a specific patient, how do you do that?

10. Do you think your method for personalising alarm limits is sensitive enough to identify an exacerbation?

Yes

No

11. If you personalise any alarms, on a scale 1 (not at all) to 10 (very much so), does personalising alarms makes the service more efficient than using arbitrary alarm limits.

1 (not at all) 10 (very much so)

12. Based on your experience of tele-health, approximately what percentage of alarms are false alarms?  
Your best guess is fine!

0-20%

20-40%

40-60%

60-80%

80-100%

13. How did you hear about this survey?

14. Please include your name and email if you wish to be entered into the draw for the voucher!

That's it, thank you, DON'T FORGET TO PRESS "DONE" below.

Name

Email Address
